**Corrigendum: *Blue-Green Systems* 5 (2), 235–251: Development of a decision-support system to select nature-based solutions for domestic wastewater treatment, Vicenç Acuña, Laura Castañares, Joana Castellar, Joaquim Comas, Katherine Cross, Darja Istenič, Fabio Masi, Robert McDonald, Bernhard Pucher, Josep Pueyo-Ros, Adrià Riu, Anacleto Rizzo, Massimiliano Riva, Katharina Tondera and Lluís Corominas, <https://dx.doi.org/10.2166/bgs.2023.005>**

The authors regret that there was an error in the spelling of Darja Istenič's name in their original paper and apologise for any inconvenience caused. The correct spelling is shown above and has also been updated on the paper. In addition, Darja Istenič's ORCID was incorrect in the original paper; the correct ORCID is 0000-0002-4705-3906. Darja Istenič is also an IWA member. The ORCID and IWA membership details have been updated on the paper.
